# Supplementary material for: Exploring Social Desirability Bias in Perceptions of Dog Adoption: All’s Well that Ends Well? Or Does the Method of Adoption Matter?
Source: MDPI journal article supplement (doi:10.3390/ani8090154), 2018-09-13
Supplement: s1 [file s1]

## Supplementary File 1

Exploring Social Desirability Bias in Perceptions of Dog Adoption: All's Well that Ends Well? Or Does the Method of Adoption Matter? *Survey questions investigated in this study, including the demographics employed for quota purposes*

Q1.1 I am:

- Male
- Female

Q1.2 I am \_\_\_\_\_ years old.

- Under 18
- 18 - 24
- 25 - 34
- 35 - 44
- 45 - 54
- 55 - 65
- 65 +

Q1.3 My household (including all other adults and children living in my household) has the following number of members (include yourself):

- Adults (18 years and older) \_\_\_\_\_
- Children (Under 18 years old) \_\_\_\_\_

Q1.4 My annual pre-tax, household income is:

- \$0-\$24,999
- \$25,000-\$49,999
- \$50,000-\$74,999
- \$75,000-\$99,999
- \$100,000 and higher

Q1.5 The best description of my educational background is:

- Did not graduate from high school
- Graduated from high school, Did not attend college
- Attended College, No Degree earned
- Attended College, Associates or Bachelor's Degree earned
- Attended College, Graduate or Professional Degree earned

Q1.6 My region of residence is: \_\_\_\_\_. Select one option from the drop down menu.

- Northeast (CT, ME, MA, NH, NJ, NY, PA, RI, VT) (1)
- South (AL, AR, DE, DC, FL, GA, KY, LA, MD, MS, NC, OK, SC, TN, TX, VA, WV) (2)
- Midwest (IL, IN, IA, KS, MI, MN, MO, NE, ND, OH, SD, WI) (3)
- West (AK, AZ, CA, CO, HI, ID, MT, NV, NM, OR, UT, WA, WY) (4)

Q2.1 In the following exercise you will be asked to select the most ethical and the least ethical way to adopt a dog. It is important to note you will be asked **10 Identical Questions**, with **DIFFERENT** answer choices.

Q2.2 From the following set of sources, select the source that is the most ethical source to adopt a dog and the least ethical source to adopt a dog.

| Most ethical          |                                       | Least ethical         |
|-----------------------|---------------------------------------|-----------------------|
| <input type="radio"/> | Adopted from a breeder                | <input type="radio"/> |
| <input type="radio"/> | Adopted from a pet store              | <input type="radio"/> |
| <input type="radio"/> | Adopted at a municipal animal shelter | <input type="radio"/> |

Q2.3 From the following set of sources, select the source that is the most ethical source to adopt a dog and the least ethical source to adopt a dog.

| Most ethical          |                                        | Least ethical         |
|-----------------------|----------------------------------------|-----------------------|
| <input type="radio"/> | Adopted from a privately owned shelter | <input type="radio"/> |
| <input type="radio"/> | Adopted from a breed rescue            | <input type="radio"/> |
| <input type="radio"/> | Adopted from a breeder                 | <input type="radio"/> |

Q2.4 From the following set of sources, select the source that is the most ethical source to adopt a dog and the least ethical source to adopt a dog.

| Most ethical          |                                        | Least ethical         |
|-----------------------|----------------------------------------|-----------------------|
| <input type="radio"/> | Adopted at a municipal animal shelter  | <input type="radio"/> |
| <input type="radio"/> | Adopted from a pet store               | <input type="radio"/> |
| <input type="radio"/> | Adopted from a privately owned shelter | <input type="radio"/> |

---

Q2.5 From the following set of sources, select the source that is the most ethical source to adopt a dog and the least ethical source to adopt a dog.

| Most ethical          |                                       | Least ethical         |
|-----------------------|---------------------------------------|-----------------------|
| <input type="radio"/> | Adopted from a breed rescue           | <input type="radio"/> |
| <input type="radio"/> | Adopted at a municipal animal shelter | <input type="radio"/> |
| <input type="radio"/> | Adopted from a pet store              | <input type="radio"/> |

Q2.6 From the following set of sources, select the source that is the most ethical source to adopt a dog and the least ethical source to adopt a dog.

| Most ethical          |                                        | Least ethical         |
|-----------------------|----------------------------------------|-----------------------|
| <input type="radio"/> | Adopted from a breeder                 | <input type="radio"/> |
| <input type="radio"/> | Adopted at a municipal animal shelter  | <input type="radio"/> |
| <input type="radio"/> | Adopted from a privately owned shelter | <input type="radio"/> |

Q2.7 From the following set of sources, select the source that is the most ethical source to adopt a dog and the least ethical source to adopt a dog.

| Most ethical          |                                        | Least ethical         |
|-----------------------|----------------------------------------|-----------------------|
| <input type="radio"/> | Adopted from a pet store               | <input type="radio"/> |
| <input type="radio"/> | Adopted from a privately owned shelter | <input type="radio"/> |
| <input type="radio"/> | Adopted from a breed rescue            | <input type="radio"/> |



Q2.8 From the following set of sources, select the source that is the most ethical source to adopt a dog and the least ethical source to adopt a dog.

| Most ethical          |                                        | Least ethical         |
|-----------------------|----------------------------------------|-----------------------|
| <input type="radio"/> | Adopted from a breed rescue            | <input type="radio"/> |
| <input type="radio"/> | Adopted from a privately owned shelter | <input type="radio"/> |
| <input type="radio"/> | Adopted at a municipal animal shelter  | <input type="radio"/> |

Q2.9 From the following set of sources, select the source that is the most ethical source to adopt a dog and the least ethical source to adopt a dog.

| Most ethical          |                                           | Least ethical         |
|-----------------------|-------------------------------------------|-----------------------|
| <input type="radio"/> | Adopted at a municipal animal shelter (1) | <input type="radio"/> |
| <input type="radio"/> | Adopted from a breeder                    | <input type="radio"/> |
| <input type="radio"/> | Adopted from a breed rescue               | <input type="radio"/> |

Q2.10 From the following set of sources, select the source that is the most ethical source to adopt a dog and the least ethical source to adopt a dog.

| Most ethical          |                                        | Least ethical         |
|-----------------------|----------------------------------------|-----------------------|
| <input type="radio"/> | Adopted from a privately owned shelter | <input type="radio"/> |
| <input type="radio"/> | Adopted from a breeder                 | <input type="radio"/> |
| <input type="radio"/> | Adopted from a pet store               | <input type="radio"/> |

Q2.11 From the following set of sources, select the source that is the most ethical source to adopt a dog and the least ethical source to adopt a dog.

| Most ethical          |                             | Least ethical         |
|-----------------------|-----------------------------|-----------------------|
| <input type="radio"/> | Adopted from a pet store    | <input type="radio"/> |
| <input type="radio"/> | Adopted from a breed rescue | <input type="radio"/> |
| <input type="radio"/> | Adopted from a breeder      | <input type="radio"/> |

Q3.1 Do you have a dog currently or have you had a dog in the past 5 years?

- No
  - I currently have a dog
  - I have had a dog in the past 5 years
-

Q3.2 How have you acquired a dog? (Select all that apply)

- Adoption (shelter or rescue organization)
  - Bred them myself
  - Purchased directly from a breeder (on-site where dogs are bred/kept)
  - Purchased directly from a breeder online (via the breeder's website)
  - Purchased from online retailer
  - Purchased from pet store
  - Stray
  - Gift from friend/family member
  - Other (i.e., parking lot)
-

Q3.3 For what reasons did you acquire your dog in that manner (Select all that apply)

- Impulse buy
- Reputation of the breeder
- Reputation of the rescue/shelter
- Previous experience
- Wanted a specific breed or type of dog
- Cost
- Guilt
- Peer pressure
- It was the right thing to do
- Dog came with pet insurance
- Dog came with training/education
- Dog came with health guarantee

Q3.4 How often do/did you take your dog to the veterinarian?

- Never
  - Once a year
  - More than once a year
  - I don't know
-

Q3.5 How often do/did you use heart worm prevention on your dog?

- Continuously
  - Sometimes
  - Never
  - I don't know
- 

Q3.6 How often do/did you use flea and tick prevention on your dog?

- Continuously
  - Sometimes
  - Never
  - I don't know
-

Q3.7 Are there any locations or methods you would **not** use to obtain a dog? (Select all that apply)

- Adoption (shelter or rescue organization)
- Bred them myself
- Purchased directly from a breeder (on-site where dogs are bred/kept)
- Purchased directly from a breeder online (via the breeder's website)
- Purchased from online retailer
- Purchased from pet store
- Stray
- Gift from friend/family member
- Other (i.e., parking lot)



Q3.8 What characteristics do you look for or believe are most important in acquiring a dog

|                                    | 1 (Very unimportant)  | 2                     | 3                     | 4 (Very important)    |
|------------------------------------|-----------------------|-----------------------|-----------------------|-----------------------|
| Breed                              | <input type="radio"/> | <input type="radio"/> | <input type="radio"/> | <input type="radio"/> |
| Appearance                         | <input type="radio"/> | <input type="radio"/> | <input type="radio"/> | <input type="radio"/> |
| Compatibility with owner lifestyle | <input type="radio"/> | <input type="radio"/> | <input type="radio"/> | <input type="radio"/> |
| Behavior                           | <input type="radio"/> | <input type="radio"/> | <input type="radio"/> | <input type="radio"/> |
| Genetic health                     | <input type="radio"/> | <input type="radio"/> | <input type="radio"/> | <input type="radio"/> |
| Physical health                    | <input type="radio"/> | <input type="radio"/> | <input type="radio"/> | <input type="radio"/> |
| Cost                               | <input type="radio"/> | <input type="radio"/> | <input type="radio"/> | <input type="radio"/> |
| Experience/reputation of source    | <input type="radio"/> | <input type="radio"/> | <input type="radio"/> | <input type="radio"/> |
| Source of the dog                  | <input type="radio"/> | <input type="radio"/> | <input type="radio"/> | <input type="radio"/> |

Q3.9 What are characteristics you believe other people look for or find most important when acquiring a dog?

|                                    | 1 (Very unimportant)  | 2                     | 3                     | 4 (Very important)    |
|------------------------------------|-----------------------|-----------------------|-----------------------|-----------------------|
| Breed                              | <input type="radio"/> | <input type="radio"/> | <input type="radio"/> | <input type="radio"/> |
| Appearance                         | <input type="radio"/> | <input type="radio"/> | <input type="radio"/> | <input type="radio"/> |
| Compatibility with owner lifestyle | <input type="radio"/> | <input type="radio"/> | <input type="radio"/> | <input type="radio"/> |
| Behavior                           | <input type="radio"/> | <input type="radio"/> | <input type="radio"/> | <input type="radio"/> |
| Genetic Health                     | <input type="radio"/> | <input type="radio"/> | <input type="radio"/> | <input type="radio"/> |
| Physical Health                    | <input type="radio"/> | <input type="radio"/> | <input type="radio"/> | <input type="radio"/> |
| Experience/reputation of source    | <input type="radio"/> | <input type="radio"/> | <input type="radio"/> | <input type="radio"/> |
| Cost                               | <input type="radio"/> | <input type="radio"/> | <input type="radio"/> | <input type="radio"/> |
| Source of the dog                  | <input type="radio"/> | <input type="radio"/> | <input type="radio"/> | <input type="radio"/> |

Q3.10 I believe that dogs can be bred responsibly.

Yes

No

Q3.11 I believe that dogs can be bred ethically.

Yes

No

Q3.12 Please rate your level of agreement or disagreement with the following statements on a scale of:

|                                                                                | 1<br>(Completely agree) | 2                     | 3                     | 4                     | 5                     | 6                     | 7<br>(Completely disagree) |
|--------------------------------------------------------------------------------|-------------------------|-----------------------|-----------------------|-----------------------|-----------------------|-----------------------|----------------------------|
| The only responsible way to acquire a dog is through shelter/rescue.           | <input type="radio"/>   | <input type="radio"/> | <input type="radio"/> | <input type="radio"/> | <input type="radio"/> | <input type="radio"/> | <input type="radio"/>      |
| All dogs should be spayed/neutered.                                            | <input type="radio"/>   | <input type="radio"/> | <input type="radio"/> | <input type="radio"/> | <input type="radio"/> | <input type="radio"/> | <input type="radio"/>      |
| There is a dog overpopulation problem in the US.                               | <input type="radio"/>   | <input type="radio"/> | <input type="radio"/> | <input type="radio"/> | <input type="radio"/> | <input type="radio"/> | <input type="radio"/>      |
| Dogs in pet stores come from irresponsible breeders.                           | <input type="radio"/>   | <input type="radio"/> | <input type="radio"/> | <input type="radio"/> | <input type="radio"/> | <input type="radio"/> | <input type="radio"/>      |
| Breeding of dogs for sale is socially irresponsible.                           | <input type="radio"/>   | <input type="radio"/> | <input type="radio"/> | <input type="radio"/> | <input type="radio"/> | <input type="radio"/> | <input type="radio"/>      |
| People should be able to buy purebred dogs.                                    | <input type="radio"/>   | <input type="radio"/> | <input type="radio"/> | <input type="radio"/> | <input type="radio"/> | <input type="radio"/> | <input type="radio"/>      |
| People should have choices as to where/how to obtain dogs.                     | <input type="radio"/>   | <input type="radio"/> | <input type="radio"/> | <input type="radio"/> | <input type="radio"/> | <input type="radio"/> | <input type="radio"/>      |
| Shelter dog populations would decrease if people stopped buying purebred dogs. | <input type="radio"/>   | <input type="radio"/> | <input type="radio"/> | <input type="radio"/> | <input type="radio"/> | <input type="radio"/> | <input type="radio"/>      |
| Every shelter/rescue dog is adoptable.                                         | <input type="radio"/>   | <input type="radio"/> | <input type="radio"/> | <input type="radio"/> | <input type="radio"/> | <input type="radio"/> | <input type="radio"/>      |

Importing of dogs  
for sale is  
irresponsible.

Importing of dogs  
for adoption is  
irresponsible.

The sale of dogs is  
socially  
irresponsible.

Q4.1 Thank you for your time in completing this survey. Your input will strengthen our research and help us obtain more accurate conclusions. If you wish to add any comments please feel free to do so here:
